# Supplementary material for: Association of Divergent Carcinoembryonic Antigen Patterns and Lung Cancer Progression
Source: PubMed Central journal article supplement (PMC7005848; doi:10.1038/s41598-020-59031-1), 2020-02-07
Supplement: 41598_2020_59031_MOESM1_ESM.pdf [file 41598_2020_59031_MOESM1_ESM.pdf]

## **Supplementary Information for**

### **Association of Divergent Carcinoembryonic Antigen Patterns and Lung Cancer Progression**

Yen-Shou Kuo, Ming-Yi Zheng, Mo-Fan Huang, Chia-Cheng Miao, Li-Hao Yang, Tsai-Wang  
Huang, Yu-Ting Chou

This file includes: Supplementary Table 1 and Supplementary Figure 1

**Supplementary Table 1.** Association between TKI therapy and progression-free survival or post-progression survival among 327 patients with EGFR mutation status

| Predictor      | Progression-free survival |                | Post-progression survival |                |
|----------------|---------------------------|----------------|---------------------------|----------------|
|                | aHR (95% CI)              | <i>P</i> value | aHR (95% CI)              | <i>P</i> value |
| Age ≥ 65 years | 1.36 (1.03–1.80)          | 0.029          | 0.88 (0.63–1.24)          | 0.472          |
| Male sex       | 1.16 (0.82–1.64)          | 0.404          | 1.27 (0.85–1.88)          | 0.241          |
| Stage IV       | 1.41 (0.95–2.08)          | 0.089          | 3.31 (1.68–6.54)          | 0.001          |
| Ever smoking   | 1.00 (0.69–1.46)          | 0.996          | 1.02 (0.67–1.56)          | 0.920          |
| TKI therapy    |                           |                |                           |                |
| Gefitinib      | Reference                 |                | Reference                 |                |
| Erlotinib      | 1.24 (0.88–1.74)          | 0.214          | 0.76 (0.49–1.19)          | 0.227          |
| Afatinib       | 1.26 (0.79–2.00)          | 0.333          | 0.61 (0.29–1.26)          | 0.179          |

TKI, tyrosine kinase inhibitors; aHR, adjusted hazard ratio; CI, confidence interval; EGFR, epidermal growth factor receptor;

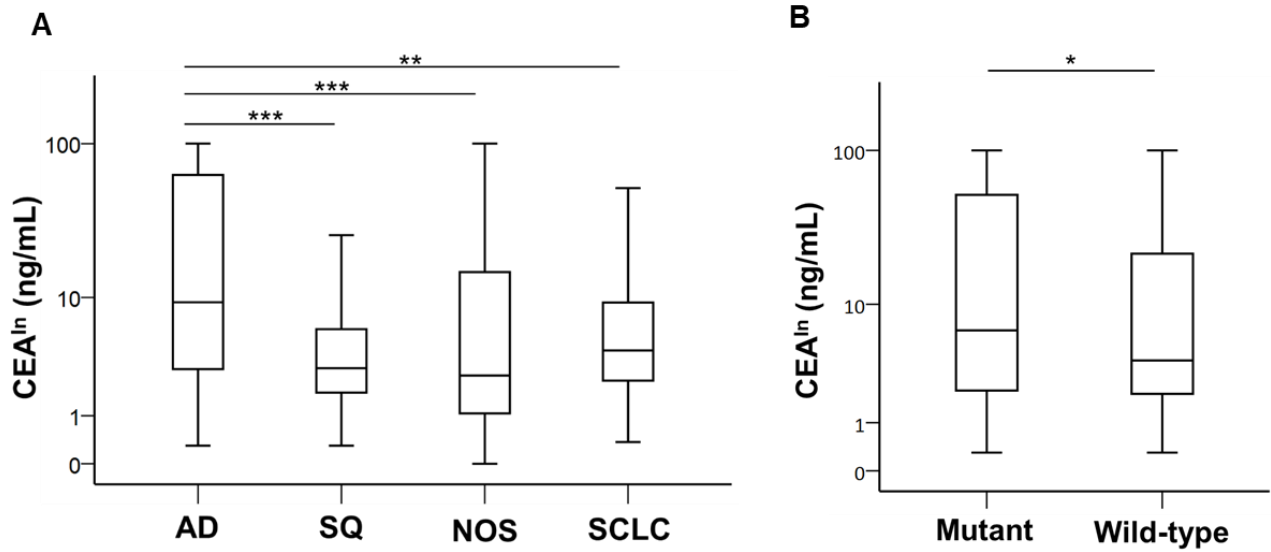

**Supplementary Figure 1.** Higher CEA<sup>In</sup> expression in patients harboring EGFR mutations  
**A.** Correlation analysis of CEA<sup>In</sup> expression with pathological subtypes of lung tumors (n = 1183) was performed using the Kruskal–Wallis test for pairwise comparison with the P value adjusted via the Bonferroni-method. CEA<sup>In</sup>, carcinoembryonic antigen level in serum at initial diagnosis; NSCLC, non-small cell lung cancer; AD, adenocarcinoma of lung, SQ, squamous cell carcinoma of lung; NSCLC-NOS: non-small cell lung cancer-not otherwise specified; SCLC, small cell lung cancer. **B.** Correlation analysis of CEA<sup>In</sup> expression with EGFR mutation status in adenocarcinomas with known EGFR status (n = 517) using the Mann–Whitney U test.
